# Supplementary material for: Impact of Nutrition on Short-Term Exercise-Induced Sirtuin Regulation: Vegans Differ from Omnivores and Lacto-Ovo Vegetarians
Source: PubMed Central journal article supplement (PMC7230533; doi:10.3390/nu12041004), 2020-04-05
Supplement: nutrients-12-01004-s001.pdf [file nutrients-12-01004-s001.pdf]

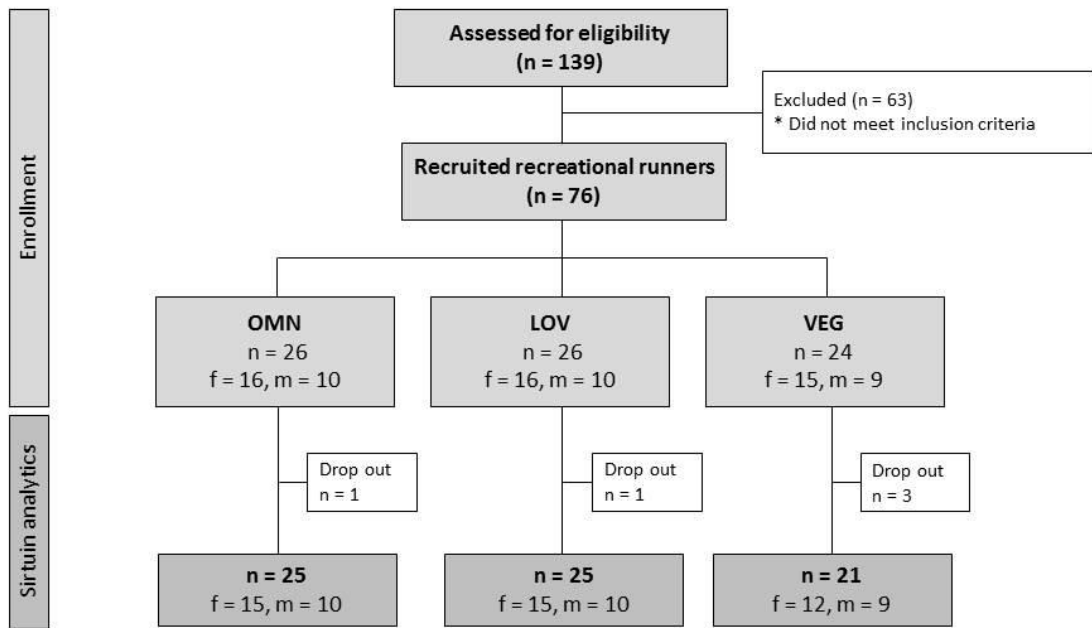

**Figure S 1.** Flow chart of the study population.

**Table S 1.** Sequences of qRT-PCR-Primers.

|                         |                                |
|-------------------------|--------------------------------|
| human SUPT20H (forward) | AAC TTT TGC TTG AGA GCC AGC    |
| human SUPT20H (reverse) | TTG CTG CCG ATT CAG AGA GG     |
| human SIRT1 (forward)   | CAA CTT GTA CGA CGA AGA C      |
| human SIRT1 (reverse)   | TCA TCA CCG AAC AGA AGG        |
| human SIRT3 (forward)   | CAG TCT GCC AAA GAC CCT TC     |
| human SIRT3 (reverse)   | AAA TCA ACC ACA TGC AGC AA     |
| human SIRT4 (forward)   | GCT GTG AGA GAA TGA AGA TGA GC |
| human SIRT4 (reverse)   | CTT GGA AAG GGT GAT GAA GCG    |
| human SIRT5 (forward)   | AGT GGT GTT CCG ACC TTC AG     |
| human SIRT5 (reverse)   | CAT CGA TGT TCT GGG TGA TG     |

**Table S 2.** Correlations of SIRT-activities with different parameters.

| <b>Sirtuin</b> | <b>Correlation with</b>          | <b>p-value</b> |
|----------------|----------------------------------|----------------|
| <b>SIRT1</b>   | Coffee                           | 0.238          |
|                | Flavonoids                       | 0.352          |
|                | Polyphenols                      | 0.324          |
|                | Vitamin B <sub>12</sub> in serum | 0.411          |
|                | Active vitamin B <sub>12</sub>   | 0.433          |
|                | Glucose                          | 0.416          |
|                | Insulin                          | 0.305          |
|                | Calories                         | 0.603          |
|                | W/kg body weight                 | 0.979          |
| <b>SIRT3</b>   | Coffee                           | 0.190          |
|                | Flavonoids                       | 0.196          |
|                | Polyphenols                      | 0.146          |
|                | Vitamine B <sub>12</sub>         | 0.349          |
|                | Active vitamin B <sub>12</sub>   | 0.140          |
|                | Glucose                          | 0.377          |
|                | Insulin                          | 0.090          |
|                | Calories                         | 0.897          |
|                | W/kg body weight                 | 0.627          |
| <b>SIRT5</b>   | Coffee                           | 0.388          |
|                | Flavonoids                       | 0.067          |
|                | Polyphenols                      | 0.382          |
|                | Vitamine B <sub>12</sub>         | 0.214          |
|                | Active vitamin B <sub>12</sub>   | 0.075          |
|                | Glucose                          | 0.274          |
|                | Insulin                          | 0.111          |
|                | Calories                         | 0.704          |
|                | W/kg body weight                 | 0.623          |

Statistical analyses were conducted with the Spearman correlation test.
